# Supplementary material for: Calling the Amino Acid Sequence of a Protein/Peptide from the Nanospectrum Produced by a Sub-nanometer Diameter Pore
Source: bioRxiv or medRxiv preprint supplement (doi:10.1101/2021.10.17.464717), 2021-10-18
Supplement: Supplementary file [file media-1.pdf]

# Calling the Amino Acid Sequence of a Protein/Peptide from the Nanospectrum Produced by a Sub-nanometer Diameter Pore (Supplementary Material)

Xiaowen Liu<sup>1,2</sup>, Zhuxin Dong<sup>3</sup> and Gregory Timp<sup>3,\*</sup>

1. Tulane Center for Biomedical Informatics and Genomics, Tulane University, New Orleans, LA, 70112, USA
2. Division of Biomedical Informatics and Genomics, Deming Department of Medicine, Tulane University, New Orleans, LA, 70112, USA
3. Department of Electrical Engineering and Biological Sciences, University of Notre Dame, Notre Dame, IN, 46556, USA

**Input:** An experimental nanospectrum  $S = s_1 s_2 \dots s_m$  and a theoretical nanospectrum  $T = t_1 t_2 \dots t_m$

**Output:** An alignment between  $S$  and  $T$

1. Initialize an  $(m+1) \times (m+1)$  table  $D$  by setting  $D[0,0] = 0$ ,  $D[1,1] = d(s_1, t_1)$  and other cells to  $\infty$ . We also assume  $D[i,j] = \infty$  when  $i < 0$  or  $j < 0$ .
2. **For**  $i = 2$  to  $m$  **do**
3.     **For**  $j = 2$  to  $m$  **do**
4.         
$$D(i, j) = \min \begin{cases} D(i-2, j-2) + d(s_{i-1}, t_{j-1}) + d(s_i, t_j) \\ D(i-2, j-3) + d(S[i-1, i], T[j-2, j]) \\ D(i-3, j-2) + d(S[i-2, i], T[j-1, j]) \end{cases}$$
5. Use backtracking to find a best alignment between  $S$  and  $T$ .

**SUPPLEMENTARY FIGURE 1.** Dynamic time warping algorithm with a constraint. The distance between two data points  $S[i-1, i]$  and three data points  $T[j-2, j]$  is defined as  $d(S[i-1, i], T[j-2, j]) = d(s_{i-1}, t_{j-2}) + d(s_i, t_j)$ . The distance between  $S[i-2, i]$  and  $T[j-1, j]$  is defined as  $d(S[i-2, i], T[j-1, j]) = d(s_{i-2}, t_{j-1}) + d(s_{i-1}, t_j) + d(s_i, t_j)$ .

**Input:** An average consensus nanospectrum  $C$ , a list of experimental nanospectra  $S_1, S_2, \dots, S_n$  in the increasing order of their distances with  $C$ , and parameter  $u$ .

**Output:** An improved consensus nanospectrum

1. **For**  $i = 1$  to  $m$  **do**
2.     Use DTW to align  $C$  and  $S_i$ . The nanospectrum  $S_i$  after time warping is represented by  $S'_i$ .
4.     Update  $C$  using the weighted average of  $C$  and  $S'_i$ . The weights of  $C$  and  $S'_i$  are  $u + i - 1$  and  $1$ , respectively.
4.     Return  $C$ .

**SUPPLEMENTARY FIGURE 2.** Algorithm for improving the average consensus nanospectrum by alignment.

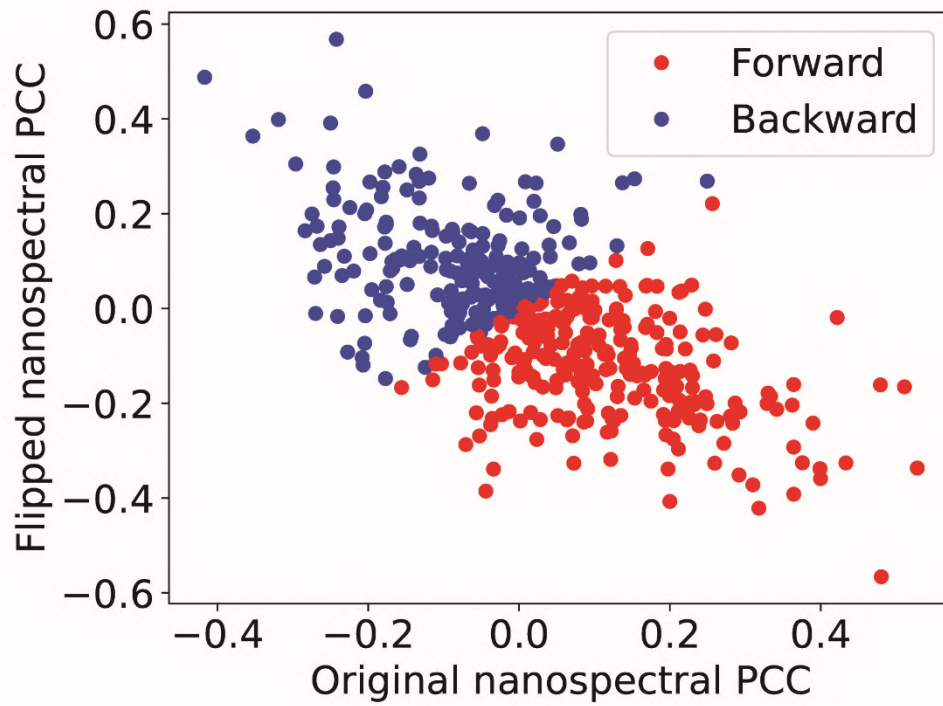

**SUPPLEMENTARY FIGURE 3.** PCCs of the empirical nanospectra and flipped empirical nanospectra of  $A\beta_{1-42}$  compared with the theoretical nanospectrum generated using 1AAV model and linear interpolation.

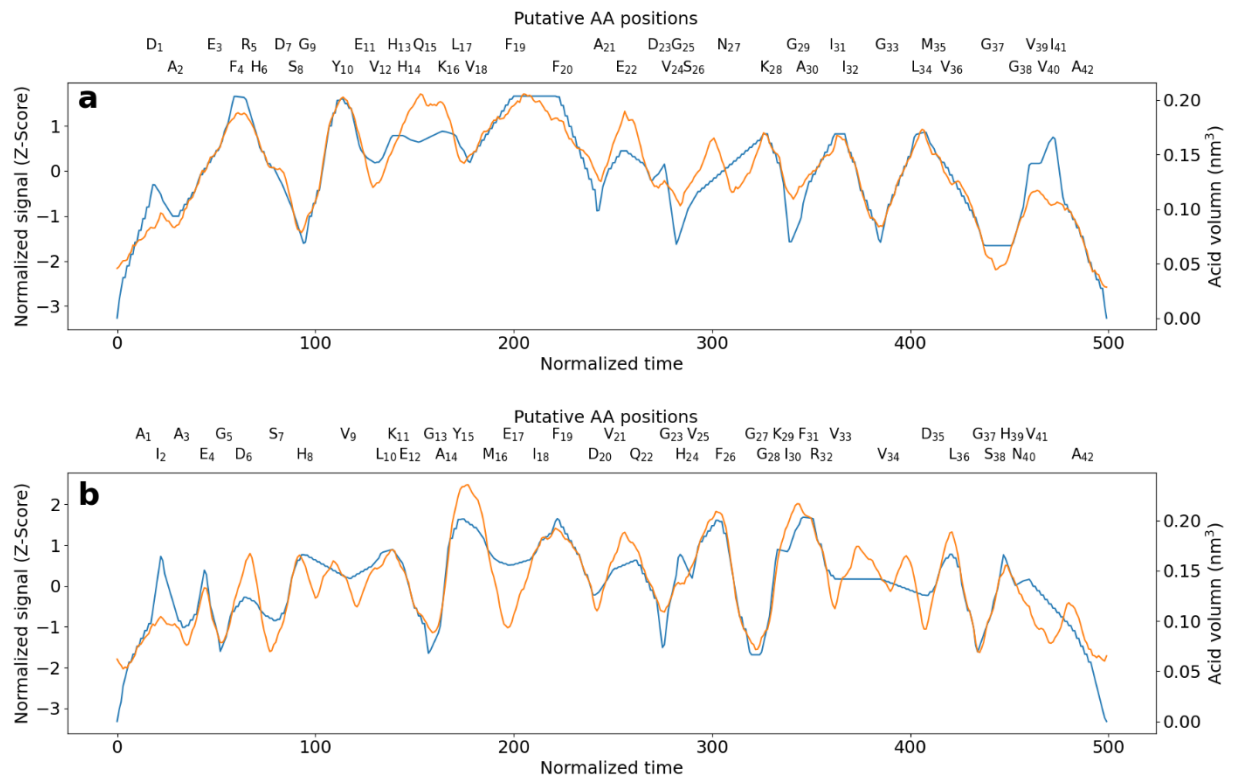

**SUPPLEMENTARY FIGURE 4. (a)** A plot of a 475-blockade alignment consensus nanospectrum of  $A\beta_{1-42}$  is shown versus normalized duration (orange line). Aligned with the empirical data is the corresponding 1AAV model (blue line) using DTW. The alignment consensus was correlated (PCC = 0.919) with the corresponding volume model. **(b)** A plot of a 2000-blockade alignment consensus nanospectrum of  $SA\beta_{1-42}$  is shown versus normalized duration (orange line). Aligned with the empirical data is the corresponding 1AAV mode (blue line) with DTW. The empirical alignment consensus was correlated (PCC = 0.876) with the corresponding 1AAV model.

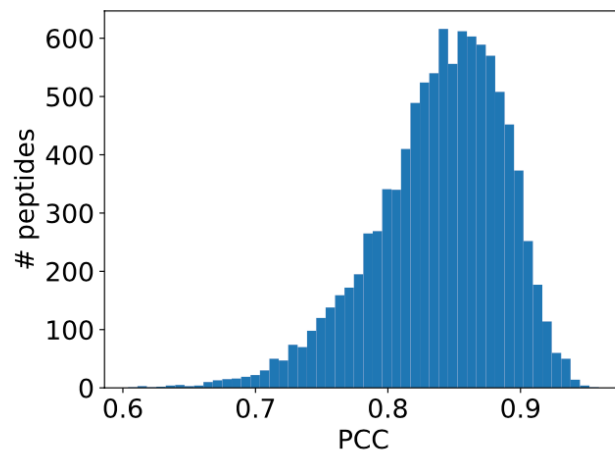

**SUPPLEMENTARY FIGURE 5.** Distribution of the PCCs between the alignment consensus nanospectra of A $\beta_{1-42}$  and the theoretical nanospectra of 10,000 random peptides after DTW.

1. Rigo, E., et al., *Measurements of the size and correlations between ions using an electrolytic point contact*. Nat Commun, 2019. **10**(1): p. 2382.
